# Supplementary material for: Tuning the porosity of biofabricated chitosan membranes in microfluidics with co-assembled nanoparticles as templates
Source: Royal Society of Chemistry journal article supplement (doi:10.1039/d0ma00073f), 2020-01-01
Supplement: d0ma00073f1.pdf [file d0ma00073f1.pdf]

## Supplement

**Table S1.** The estimated hydrodynamic radius for F-dextran of different mass obtain using the hydrodynamic radius estimator of Zetasizer software.

| F-Dextran (kDa)                    | 4           | 10          | 70          |
|------------------------------------|-------------|-------------|-------------|
| Estimated hydrodynamic radius (nm) | 1.08 – 1.71 | 1.59 – 2.41 | 3.66 – 7.04 |

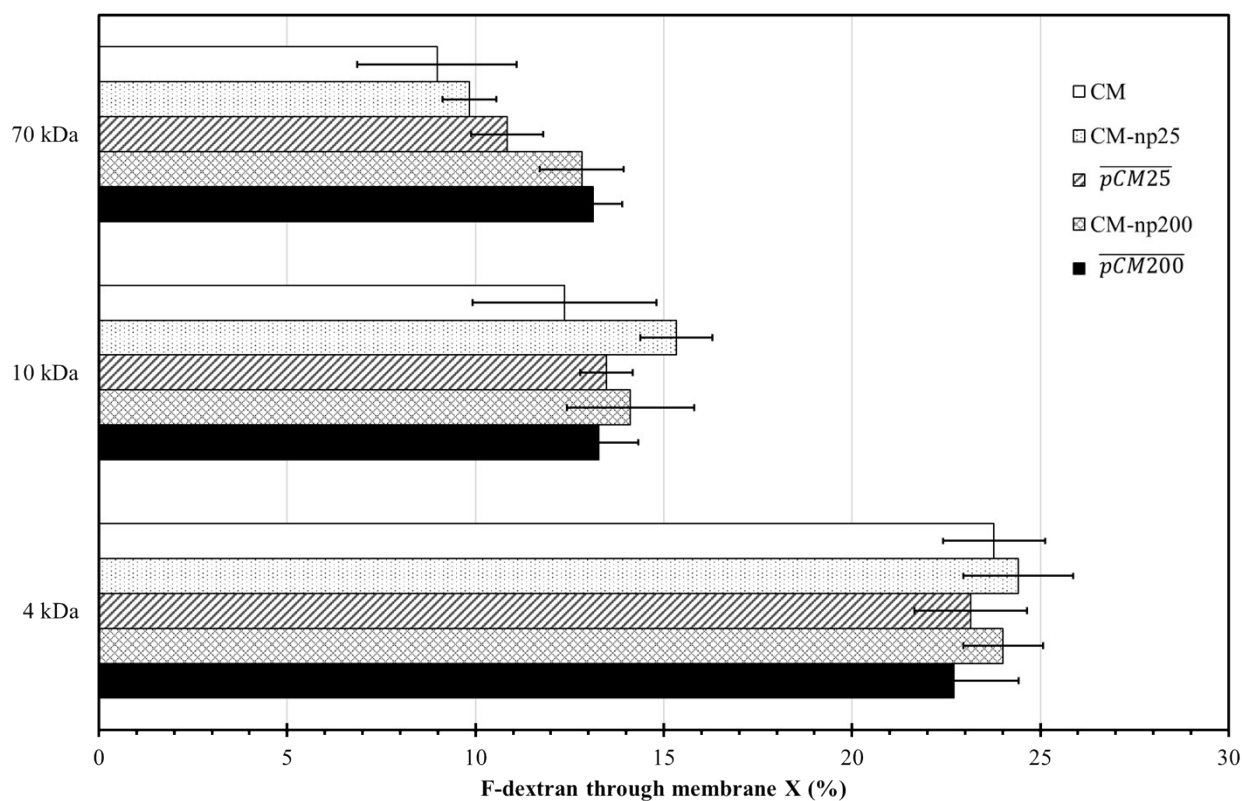

**Fig S1.** The percentage of F-dextran passed through CM, CM-np25, CM-np200,  $p\overline{CM}25$ , and  $p\overline{CM}200$  as controls; error bars represent the standard deviations of 5 measurements. *Note:*  $p\overline{CM}25$  and  $p\overline{CM}200$  are membranes treated directly with DMSO without crosslinking.
